# Supplementary material for: Controlling palladium particle size and dispersion as a function of loading by chemical vapour impregnation: an investigation using propane total oxidation as a model reaction
Source: Royal Society of Chemistry journal article supplement (doi:10.1039/d4cy00665h), 2024-01-01
Supplement: d4cy00665h1.pdf [file d4cy00665h1.pdf]

## Supporting Information

### **Controlling Palladium Particle Size and Dispersion as a Function of Loading by Chemical Vapour Impregnation: An Investigation Using Propane Total Oxidation as a Model Reaction**

Liam A. Bailey,<sup>1\*</sup> Mark Douthwaite,<sup>1</sup> Thomas E. Davies,<sup>1</sup> David J. Morgan,<sup>1</sup> Stuart H. Taylor<sup>1\*</sup>

<sup>1</sup> Max Planck-Cardiff Centre on the Fundamentals of Heterogeneous Catalysis FUNCAT, Cardiff Catalysis Institute, School of Chemistry, Cardiff University, Translational Research Hub, Maindy Road, Cardiff CF24 4HQ, UK.

\*Corresponding Authors: Liam A. Bailey (Email: [baileyla2@cardiff.ac.uk](mailto:baileyla2@cardiff.ac.uk)), Stuart H. Taylor (Email: [taylorsh@cardiff.ac.uk](mailto:taylorsh@cardiff.ac.uk))

Table S1. Activity data for the Pd/Al<sub>2</sub>O<sub>3</sub> catalysts synthesised by wet impregnation. T<sub>20</sub> = Temperature at which 20 % conversion was achieved. T<sub>50</sub> = Temperature at which 50 % conversion was achieved. Reaction conditions: 1000 ppm propane/10% O<sub>2</sub>/N<sub>2</sub>, Gas Hourly Space Velocity (GHSV) 50,000 h<sup>-1</sup>, Temperature range 200 – 500 °C.

| Catalyst                                  | T <sub>20</sub> (°C) | T <sub>50</sub> (°C) | Decomposition rate at 250 °C (mol <sub>C<sub>6</sub>H<sub>8</sub></sub> h <sup>-1</sup> kg <sub>cat</sub> <sup>-1</sup> ) |
|-------------------------------------------|----------------------|----------------------|---------------------------------------------------------------------------------------------------------------------------|
| 1.0 Wt% Pd/Al <sub>2</sub> O <sub>3</sub> | 297                  | 335                  | 2.05x10 <sup>-6</sup>                                                                                                     |
| 2.5 Wt% Pd/Al <sub>2</sub> O <sub>3</sub> | 276                  | 305                  | 1.51x10 <sup>-6</sup>                                                                                                     |
| 5.0 Wt% Pd/Al <sub>2</sub> O <sub>3</sub> | 301                  | 335                  | 4.46x10 <sup>-7</sup>                                                                                                     |

Table S2. Palladium oxidation state and surface concentration for catalysts synthesised by chemical vapour impregnation as determined by XPS.

| Catalyst                                  | Pd oxidation state <sup>a</sup> | Surface concentration (%) |
|-------------------------------------------|---------------------------------|---------------------------|
| 1.0 Wt% Pd/Al <sub>2</sub> O <sub>3</sub> | 2+                              | 0.19                      |
| 2.5 Wt% Pd/Al <sub>2</sub> O <sub>3</sub> | 2+                              | 0.40                      |
| 5.0 Wt% Pd/Al <sub>2</sub> O <sub>3</sub> | 2+                              | 0.70                      |

Table S3. Post reaction CO chemisorption data for catalysts synthesised by CVI after 50 hour TOL study

| Sample                              | Palladium surface sites ( $\text{g}^{-1}$ ) | Dispersion (%) |
|-------------------------------------|---------------------------------------------|----------------|
| 1.0 Wt% Pd/ $\text{Al}_2\text{O}_3$ | $2.05 \times 10^{19}$                       | 30             |
| 2.5 Wt% Pd/ $\text{Al}_2\text{O}_3$ | $3.98 \times 10^{19}$                       | 28             |
| 5.0 Wt% Pd/ $\text{Al}_2\text{O}_3$ | $7.95 \times 10^{19}$                       | 26             |

Table S4. Physicochemical properties of the Pd/Al<sub>2</sub>O<sub>3</sub> wet impregnation catalysts from MP-AES and BET analysis.

| Sample                                    | Pd weight loading (%) | BET (m <sup>2</sup> g <sup>-1</sup> ) |
|-------------------------------------------|-----------------------|---------------------------------------|
| 1.0 Wt% Pd/Al <sub>2</sub> O <sub>3</sub> | 0.91                  | 125                                   |
| 2.5 Wt% Pd/Al <sub>2</sub> O <sub>3</sub> | 2.45                  | 125                                   |
| 5.0 Wt% Pd/Al <sub>2</sub> O <sub>3</sub> | 4.98                  | 125                                   |

Table S5. Physical properties and activity characteristics of Pd/Al<sub>2</sub>O<sub>3</sub> catalysts synthesised by wet impregnation extracted from and based on CO chemisorption characterisation.

| Sample                                    | CO adsorbed (mmol g <sup>-1</sup> ) | Palladium surface sites <sup>a</sup> (g <sup>-1</sup> ) | Dispersion <sup>a</sup> (%) | TOF <sup>b</sup> (10 <sup>-3</sup> )(s <sup>-1</sup> ) |
|-------------------------------------------|-------------------------------------|---------------------------------------------------------|-----------------------------|--------------------------------------------------------|
| 1.0 Wt% Pd/Al <sub>2</sub> O <sub>3</sub> | 5.56x10 <sup>-3</sup>               | 6.79x10 <sup>18</sup>                                   | 12                          | 1.81                                                   |
| 2.5 Wt% Pd/Al <sub>2</sub> O <sub>3</sub> | 1.45x10 <sup>-2</sup>               | 1.70x10 <sup>19</sup>                                   | 8                           | 2.01                                                   |
| 5.0 Wt% Pd/Al <sub>2</sub> O <sub>3</sub> | 1.71x10 <sup>-2</sup>               | 1.98x10 <sup>19</sup>                                   | 7                           | 6.79                                                   |

a. Calculated from CO chemisorption assuming a stoichiometry of 2.

b. Calculated at 250 °C

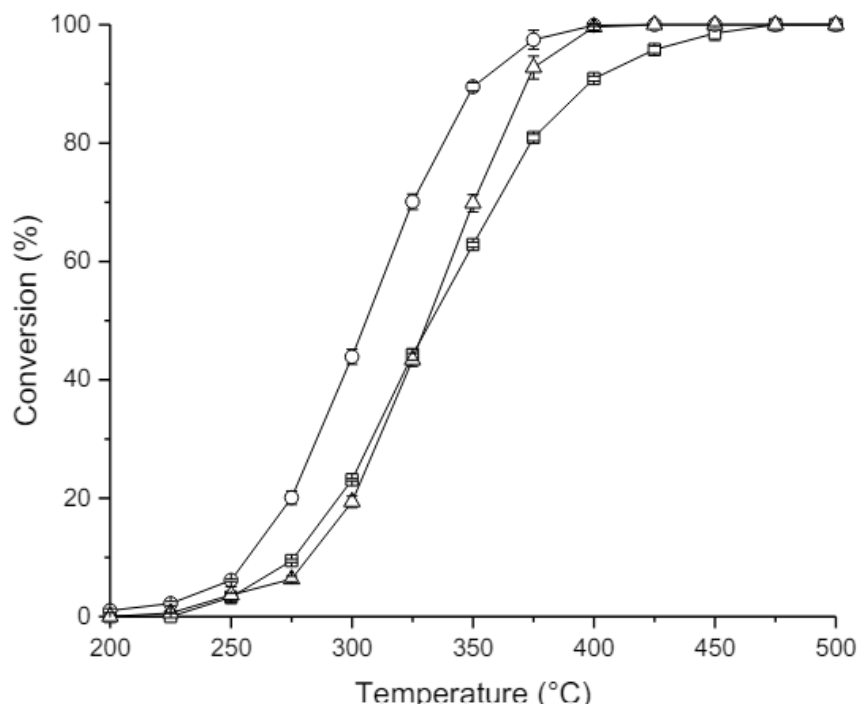

Figure S1. Propane conversion as a function of temperature for the Pd/Al<sub>2</sub>O<sub>3</sub> catalysts synthesised by wet impregnation. (Square) 1.0 Wt% Pd/Al<sub>2</sub>O<sub>3</sub>, (Circle) 2.5 Wt% Pd/Al<sub>2</sub>O<sub>3</sub>, (Triangle) 5.0 Wt% Pd/Al<sub>2</sub>O<sub>3</sub>. Reaction conditions: 1000 ppm propane/10% O<sub>2</sub>/N<sub>2</sub>, Gas Hourly Space Velocity (GHSV) 50,000 h<sup>-1</sup>, Temperature range 200 – 500 °C.

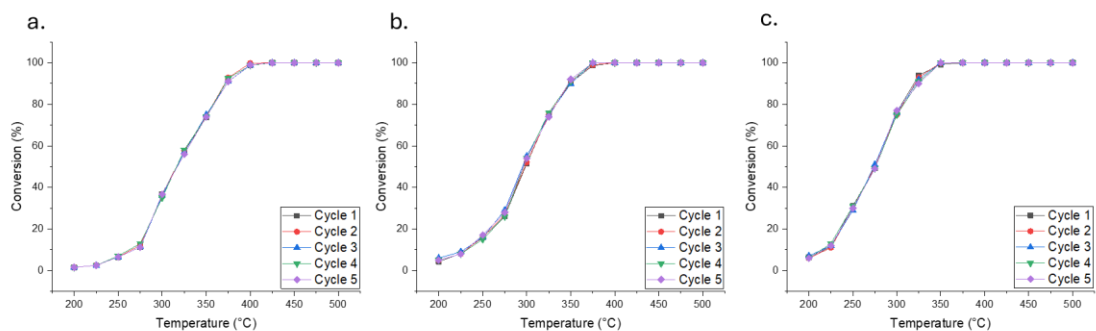

Figure S2. Stability testing for the catalysts synthesised by chemical vapour impregnation showing propane conversion as a function of temperature over multiple tests. A. 1.0 Wt% Pd/Al<sub>2</sub>O<sub>3</sub> b. 2.5% Wt% Pd/Al<sub>2</sub>O<sub>3</sub> c. 5.0 Wt% Pd/Al<sub>2</sub>O<sub>3</sub> Reaction conditions: 1000 ppm propane/10% O<sub>2</sub>/N<sub>2</sub>, Gas Hourly Space Velocity (GHSV) 50,000 h<sup>-1</sup>, Temperature range 200 – 500 °C.



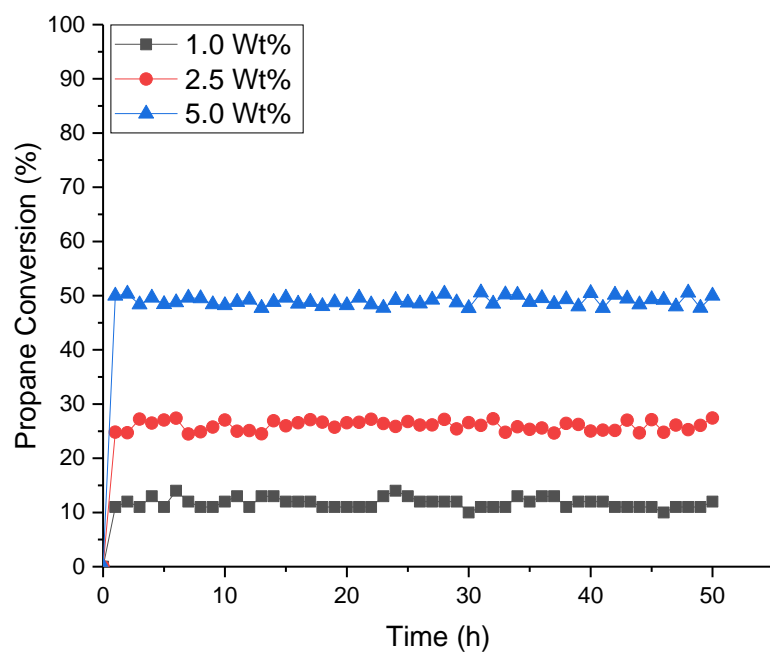

Figure S3. 50 hour time on line study the catalysts synthesised by chemical vapour impregnation showing propane conversion as a function of time. Reaction conditions: 1000 ppm propane/10% O<sub>2</sub>/N<sub>2</sub>, Gas Hourly Space Velocity (GHSV) 50,000 h<sup>-1</sup>, Temperature 275 °C.

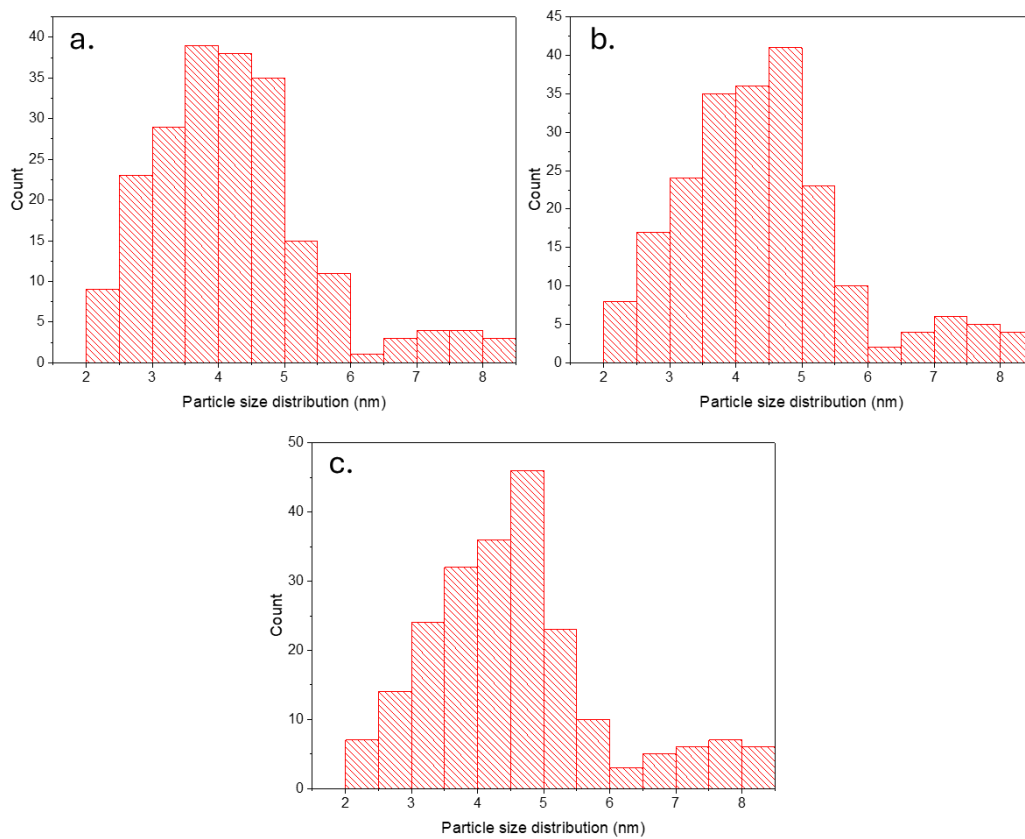

Figure S4. Palladium nanoparticle size distribution for catalysts synthesised by chemical vapour impregnation a. 1.0 Wt% Pd/Al<sub>2</sub>O<sub>3</sub> b. 2.5 Wt% Pd/Al<sub>2</sub>O<sub>3</sub> c. 5.0 Wt% Pd/Al<sub>2</sub>O<sub>3</sub>

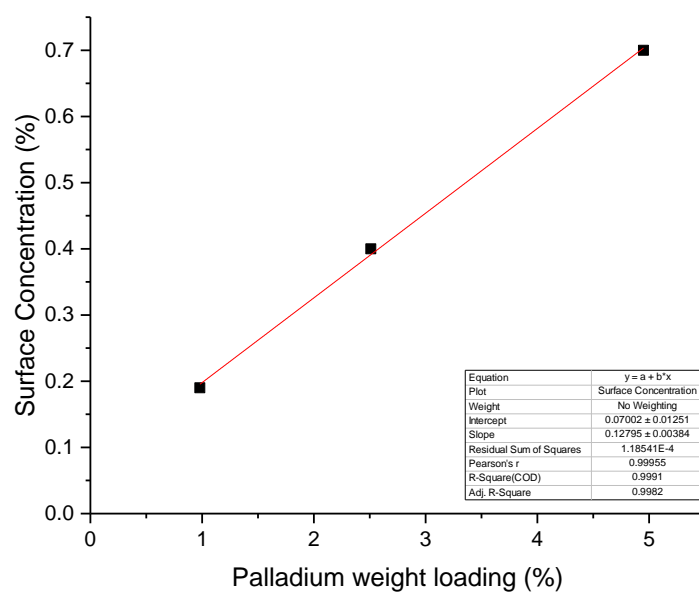

Figure S5. Figure demonstrating the linear relationship between the palladium weight loading calculated by MP-AES, and the surface concentration of palladium (calculated from XPS data), for catalysts synthesised by CVI.

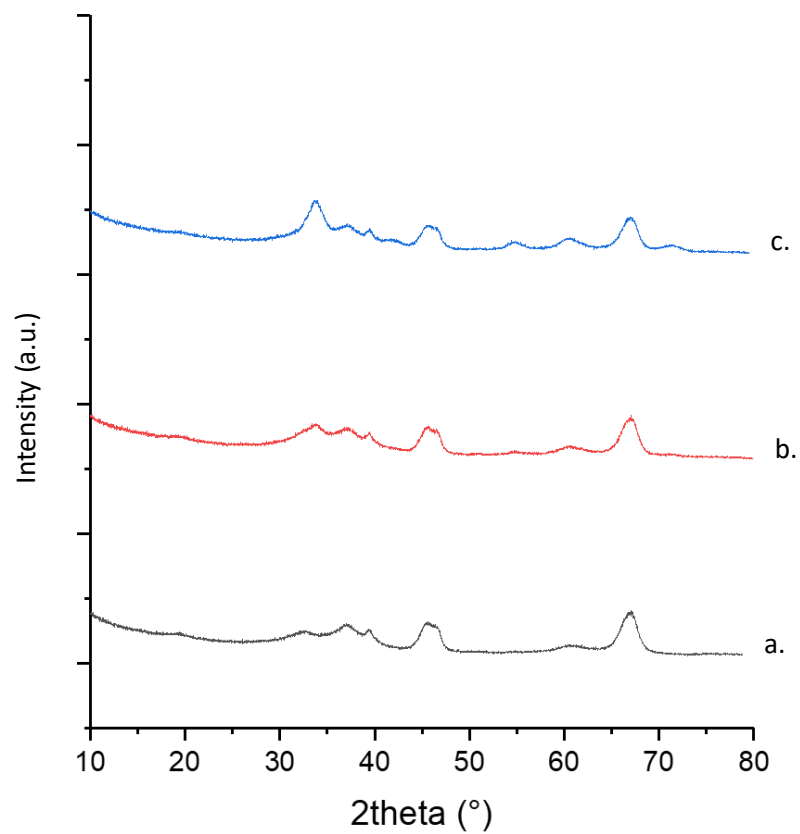

Figure S6. XRD scattering patterns of the samples synthesised by chemical vapour impregnation taken after a 50 hours time on line reaction. a. 1.0 Wt% Pd/Al<sub>2</sub>O<sub>3</sub> b. 2.5% Pd/Al<sub>2</sub>O<sub>3</sub> c. 5.0 Wt% Pd/Al<sub>2</sub>O<sub>3</sub>

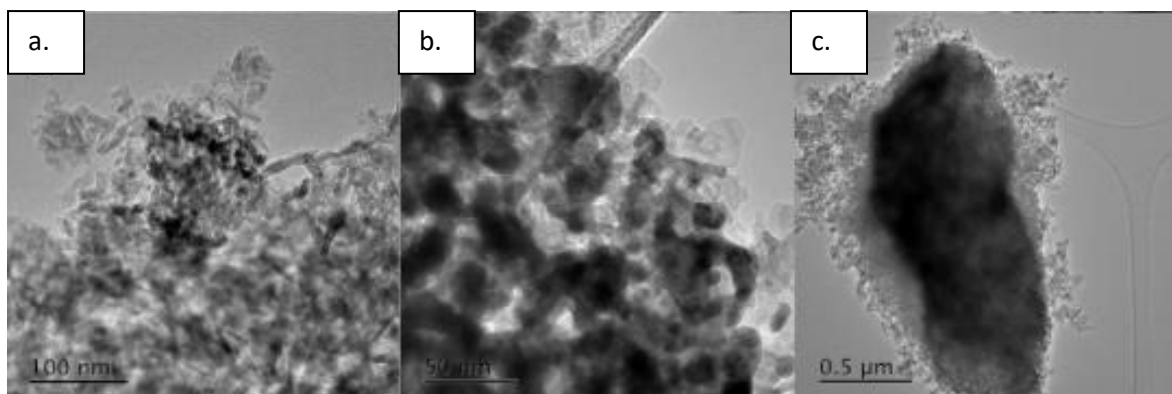

Figure S7. TEM micrographs of the catalysts prepared by wet impregnation. a. 1.0 Wt% Pd/Al<sub>2</sub>O<sub>3</sub>, b. 2.5 Wt% Pd/Al<sub>2</sub>O<sub>3</sub>, c. 5.0 Wt% Pd/Al<sub>2</sub>O<sub>3</sub>

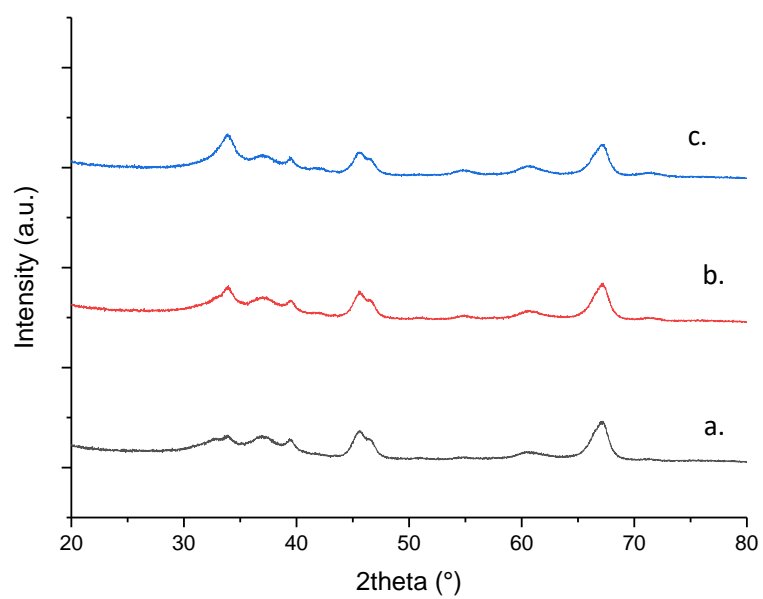

Figure S8. XRD scattering pattern for catalysts synthesised by wet impregnation. (a.) 1.0 Wt% Pd/Al<sub>2</sub>O<sub>3</sub>, (b.) 2.5 Wt% Pd/Al<sub>2</sub>O<sub>3</sub> and (c.) 5.0 Wt% Pd/Al<sub>2</sub>O<sub>3</sub> catalysts.

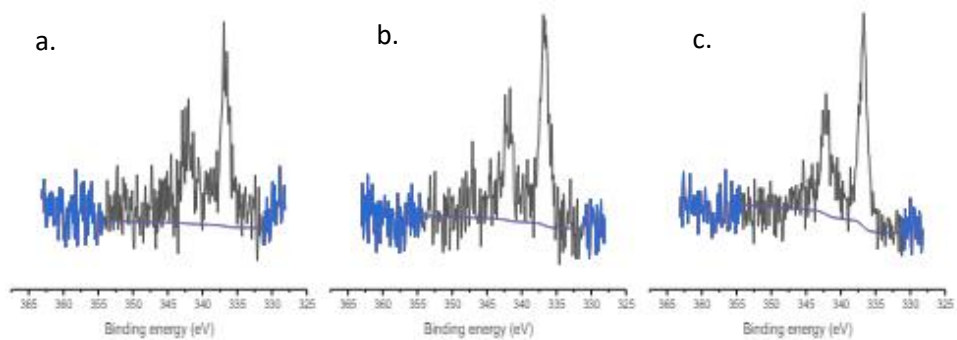

Figure S9. Pd 3d core-level XPS spectra for (a.) 1.0Wt.% Pd/Al<sub>2</sub>O<sub>3</sub>, (b.) 2.5Wt.% Pd/Al<sub>2</sub>O<sub>3</sub> and (c.) 5.0Wt.% Pd/Al<sub>2</sub>O<sub>3</sub> catalysts synthesised by wet impregnation.

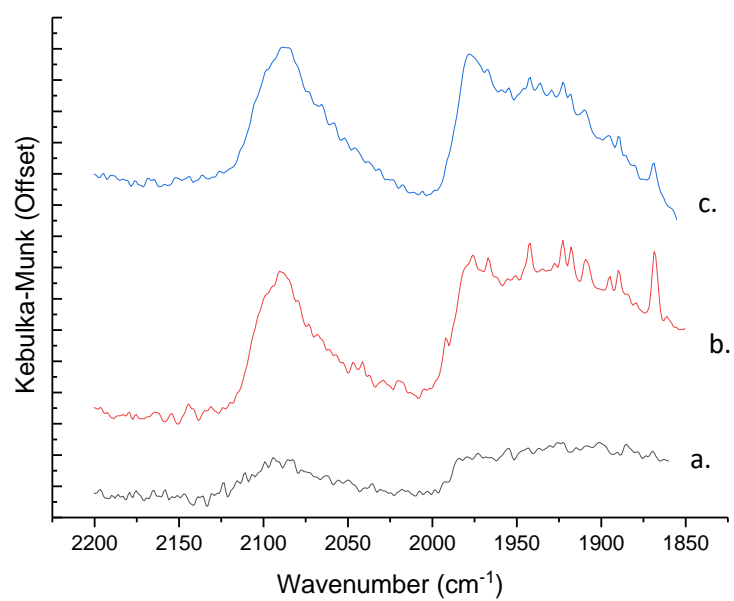

Figure S10. DRIFT spectra of CO adsorbed at room temperature for (a.) 1.0 Wt% Pd/Al<sub>2</sub>O<sub>3</sub>, (b.) 2.5 Wt% Pd/Al<sub>2</sub>O<sub>3</sub> and (c.) 5.0 Wt% Pd/Al<sub>2</sub>O<sub>3</sub> catalysts for samples synthesised by wet impregnation.
